1 **Crystal structures of full length DENV4 NS2B-NS3 reveal the dynamic interaction**  
2 **between NS2B and NS3 upon binding to protease inhibitors**

3 Wint Wint Phoo<sup>1,2,3</sup>, Abbas El Sahili<sup>2,3</sup>, ZhenZhen Zhang<sup>1,2</sup>, Ming Wei Chen<sup>1,a</sup>, Chong Wai  
4 Liew<sup>2,3</sup>, Julien Lescar<sup>2,3\*</sup>, Subhash G. Vasudevan<sup>4,5\*</sup>, Dahai Luo<sup>1,2\*</sup>

5 Affiliations

6 <sup>1</sup>Lee Kong Chian School of Medicine, Nanyang Technological University, EMB 03-07, 59  
7 Nanyang Drive, Singapore 636921

8 <sup>2</sup>NTU Institute of Structural Biology, Nanyang Technological University, EMB 06-01, 59  
9 Nanyang Drive, Singapore 636921.

10 <sup>3</sup>School of Biological Sciences, Nanyang Technological University, 60 Nanyang Drive,  
11 Singapore 636921.

12 <sup>4</sup>Emerging Infectious Diseases, DUKE NUS Graduate Medical School, 8 College Road, 09- ,  
13 Singapore,

14 <sup>5</sup>Department of Microbiology, Yong Loo Lin School of Medicine, National University of  
15 Singapore

16 <sup>a</sup>Present address: Protein Production Platform, School of Biological Sciences, Nanyang  
17 Technological University, 61 Biopolis Drive, 07-01, Singapore 138673.

18 \*Correspondence e-mails: [julien@ntu.edu.sg](mailto:julien@ntu.edu.sg) ; [subhash.vasudevan@duke-nus.edu.sg](mailto:subhash.vasudevan@duke-nus.edu.sg) ;  
19 [luodahai@ntu.edu.sg](mailto:luodahai@ntu.edu.sg)

## 21 **Abstract**

22 Flavivirus is a genus of emerging and re-emerging arboviruses which include many  
23 significant human pathogens. Non-structural protein 3 (NS3), a multifunctional protein with  
24 N-terminal protease and C-terminal helicase, is essential in viral replication. The NS3  
25 protease together with NS2B cofactor is an attractive antiviral target. A construct with an  
26 artificial glycine linker connecting the NS2B cofactor and NS3 protease has been used for  
27 structural, biochemical and drug-screening studies. The effect of this linker on dynamics and  
28 enzymatic activity of the protease was studied by several biochemical and NMR methods but  
29 the findings remained inconclusive. Here, we designed constructs of NS2B cofactor joined to  
30 full length DENV4 NS3 in three different manners, namely **bNS2B<sub>47</sub>NS3** (**bivalent**),  
31 **eNS2B<sub>47</sub>NS3**(enzymatically cleavable) and **gNS2B<sub>47</sub>NS3** (**glycine-rich G4SG4 linker**). We  
32 report the first crystal structures of linked and unlinked full-length NS2B-NS3 enzyme in its  
33 free state and also in complex with Bovine Pancreatic Trypsin Inhibitor (BPTI). These  
34 structures demonstrate that the NS2B-NS3 protease mainly adopts a closed conformation.  
35 BPTI binding is not essential to but favors the closed conformation by interacting with both  
36 NS2B and NS3. The artificial linker between NS2B and NS3 tends to induce the open  
37 conformation and interfere with the protease activity. This negative impact on the enzyme  
38 structure and function is restricted to the protease domain as the ATPase activities of these  
39 constructs are not affected.

40

41

## 42 **Introduction**

43 Flaviviruses include many significant human pathogens such as dengue virus (DENV), West  
44 Nile virus (WNV) and recently re-emerging Zika virus (ZIKV). Recent outbreak of ZIKV  
45 infections in America has caused global health concern since the infections were linked to  
46 neuropathic Guillain-Barré syndrome in adults and microcephaly in infants [1-3]. DENV,  
47 has been emerging in the past decade and is a global healthcare burden. The emergence of  
48 pandemic DENV and epidemic ZIKV infections in the past years due to globalisation and  
49 urbanisation call for countermeasures such as the development of potent antivirals against  
50 these infections.

51 Flaviviruses are enveloped viruses which contain a single-stranded positive-sense RNA  
52 genome of about 11 kb, with 3' and 5' untranslated regions (UTR) [4]. The genome encodes  
53 a poly-protein precursor which is cleaved into three structural proteins and seven non-  
54 structural proteins by host and viral proteases [4, 5]. Non-structural protein 3 (NS3) plays  
55 essential roles in viral replication and polyprotein processing and is an attractive anti-viral  
56 target [6]. The N-terminal domain of NS3 (residues 1-168) is a serine protease responsible for  
57 cleavage of polyprotein precursors into mature functional proteins [7-12]. The C-terminal  
58 domain of NS3 is an NTPase/Helicase involved in viral replication and virion assembly [13-  
59 15]. Recently, several drugs targeting the Hepatitis C virus (HCV) NS3 protease have been  
60 approved by the U.S. Food & Drug Administration (FDA) [16]. However, no NS3 inhibitor  
61 for DENV has advanced to clinical trials [7, 17, 18].

62 The N-terminal protease contains a catalytic triad formed by residues Ser-135, His-51, and  
63 Asp-75 [19] and requires NS2B protein as cofactor for endoplasmic reticulum (ER)  
64 membrane anchorage, proper folding, and protease activity [9, 10, 19]. Soluble and  
65 catalytically active recombinant NS2B<sub>47</sub>-G<sub>4</sub>SG<sub>4</sub>-NS3 protease (hereaftercalled gNS2B<sub>47</sub>NS3

66 Pro) was designed by tethering central NS2B cofactor to NS3 protease by a flexible artificial  
67 glycine linker [20]. Structural studies of the flavivirus NS3 protease have been done utilizing  
68 this construct design except for the recent ZIKV protease studies [12, 21-24]. These studies  
69 using conventional glycine-linked constructs demonstrated that the NS2B N-terminus  
70 contributes to the folding of protease by inserting a  $\beta$ -strand to the N-terminal  $\beta$ -barrel of  
71 protease [11, 12, 22, 25-27]. The C-terminus of NS2B is flexible and is only observed in  
72 crystal structures where the protease is bound to an inhibitor or a substrate, suggesting that it  
73 is acting as a flap closing upon substrate binding [11, 12, 22, 26]. The free protease  
74 structures with flexible NS2B C-terminus are said to adopt an “open” conformation, while the  
75 protease-inhibitor structures with NS2B contributing to substrate binding site show a  
76 “closed” conformation. Although all crystal structures of free gNS2B<sub>47</sub>NS3 protease are  
77 reported to adopt the open conformation, NMR studies have shown that in solution,  
78 gNS2B<sub>47</sub>NS3 protease interconverts between the open and closed conformations even in the  
79 absence of an inhibitor [28-32]. These studies also showed that when NS2B and NS3 are  
80 separate polypeptides, the NS2B-NS3 protease complex is mainly in the closed conformation  
81 without the substrate [29, 32].

82 Structural studies on ZIKV NS2B<sub>47</sub>NS3 protease shed new light on this unsolved issue.  
83 Zhang et al have reported a crystal structure of unlinked ZIKV protease (bZiPro) in closed  
84 conformation without an inhibitor [33]. The biochemical studies of ZIKV NS2B-NS3  
85 protease constructs with glycine linker (gZiPro), NS2B-NS3 enzymatic cleavage site linker  
86 (eZiPro) and bivalent unlinked NS2B NS3 protease (bZiPro) have revealed that the flexible  
87 glycine linker interferes with the protease activities resulting in lower  $k_{cat}$  [24]. Shannon et al  
88 posited that reduced product release could be the possible mechanism behind the lower  
89 activity of glycine-linked constructs based on studies carried with the DENV2 bivalent co-  
90 expressed NS2B NS3 protease (bNS2B<sub>47</sub>NS3 Pro) and glycine-linked NS2B NS3 protease

91 (gNS2B<sub>47</sub>NS3 Pro) [34]. Optimising construct designs to obtain biologically relevant crystal  
92 structures is an important factor for structure-based drug discovery. The crystal structures of  
93 separate domains of DENV NS3 have been reported, as well as full-length NS3 together with  
94 an 18-residues cofactor region of NS2B (NS2B<sub>18</sub>NS3)[12, 25, 35-37]. Full-length  
95 gNS2B<sub>47</sub>NS3 from Murine valley encephalitis virus (MVEV) has also been reported to adopt  
96 an open conformation in the absence of inhibitor [38]. Although the protease and  
97 NTPase/helicase domains of full length DENV4 NS2B<sub>18</sub>NS3 showed similar folds to those in  
98 MVEV NS2B<sub>47</sub>-NS3, domain arrangements between helicase and protease were found to be  
99 different, consistent with the flexibility of the linker region between the two functional  
100 domains. Here we designed bivalent, enzymatic cleavage site linked and conventional  
101 flexible glycine linked NS2B cofactor with full length DENV4 NS3 constructs namely  
102 bNS2B<sub>47</sub>NS3, eNS2B<sub>47</sub>NS3, and gNS2B<sub>47</sub>NS3 similar to those in our previous studies on  
103 ZIKV protease [24]. We report three crystal structures of full length DENV4 NS2B<sub>47</sub>NS3  
104 constructs, eNS2B<sub>47</sub>NS3 and gNS2B<sub>47</sub>NS3 in free form and two in complex with Bovine  
105 Pancreatic Trypsin Inhibitor (BPTI). The structural analysis suggests that the NS2B-NS3  
106 protease has a preformed active site with NS2B cofactor wrapped around NS3 participating  
107 in substrate binding. The biochemical studies of the ATPase activities of full length NS3  
108 demonstrate uncoupled enzymatic activities for the full length NS3 protein.

109

110

## 111 **Results**

### 112 **Design and preparation of unlinked and linked full length NS2B<sub>47</sub>NS3 proteins**

113 To overcome the problem of poor expression of wild type gNS2B<sub>47</sub>NS3 proteins, we mutated  
114 the protease at either (1) S135 to alanine (S135A) or (2) hydrophobic residues on the surface,  
115 L30 and F31 to serine (L30S-F31S) [35]. The protease activity of gNS2B<sub>47</sub>NS3 Pro and of  
116 gNS2B<sub>47</sub>NS3 Pro (L30S-F31S) are comparable indicating that L30S-F31S mutation does not  
117 interfere with the proteolytic activity of NS3 unlike the S135A mutation which completely  
118 abolished protease activity (S1 Fig). We replaced the glycine linker of gNS2B<sub>47</sub>NS3 with the  
119 NS2B C-terminal penta-peptide (VKTQR) resulting in endogenous enzyme cleavable NS2B-  
120 NS3 constructs - eNS2B<sub>47</sub>NS3 (S135A) and eNS2B<sub>47</sub>NS3 (L30S-F31S) (Fig 1A). We name  
121 this eNS2B<sub>47</sub>NS3 L30S-F31S construct as unlinked eNS2B<sub>47</sub>NS3 since the NS2B/NS3  
122 cleavage site was fully cleaved by the protease resulting in heterodimers of NS2B cofactor  
123 peptide-NS3. The bivalent construct bNS2B<sub>47</sub>NS3 was designed by co-expressing NS2B  
124 cofactor and NS3 sequences which fold as a heterodimer, similar to bZiPro [24, 33]. SDS-  
125 PAGE analysis of proteins showed that eNS2B<sub>47</sub>NS3 L30S-F31S undergoes complete  
126 proteolysis resulting in unlinked full length NS3 similar to ZIKV eZiPro [24] (Fig 1B). The  
127 constructs and mutations are listed in Figure 1C. All full length NS2B<sub>47</sub>NS3 proteins were  
128 soluble and monomeric in solution as shown by the size exclusion chromatography profiles  
129 (S2 Fig A). Internal proteolysis at NS3 was observed during and after purification for all  
130 constructs with active protease, and gNS2B<sub>47</sub>NS3 degraded slightly more slowly than the  
131 bNS2B<sub>47</sub>NS3 and eNS2B<sub>47</sub>NS3 (S2 Fig B).

### 132 **Structures of full length NS2B<sub>47</sub>NS3**

133 The NS2B<sub>47</sub>NS3 proteins were crystallised using very similar conditions (S1 Table). The  
134 crystals were assigned into three groups that are related to the protein conformation: (1) Open

135 conformation in which the C terminal region of the cofactor NS2B was disordered (Fig 2A);  
136 (2) -Closed conformation in which the C-terminus of NS2B loosely forms a beta hairpin (Fig  
137 2B, 2D);(3) BPTI-bound closed conformation with similar but less dynamic NS2B C-  
138 terminus beta hairpin (Fig 2C, 2E). The correlation between the overall conformations and  
139 the unit cell dimensions is apparent from Table S1. The open conformation was only captured  
140 in gNS2B<sub>47</sub>NS3 (Fig 2A), which closely resembles the structure of DENV4 gNS2B<sub>18</sub>NS3  
141 conformation I (PDB id: 2VBC) [35], while the remaining free enzyme structures are in  
142 closed conformation (Fig 2B, 2D). The gNS2B<sub>47</sub>NS3-BPTI structure and eNS2B<sub>47</sub>NS3-BPTI  
143 structures adopt the same conformation (Fig 1E, G). On the other hand, the bNS2B<sub>47</sub>NS3  
144 protein crystals diffracted poorly to about 4 Å and as a result, we failed to find a convincing  
145 structure solution by molecular replacement. The unit cell dimensions of bNS2B<sub>47</sub>NS3  
146 crystals were similar to the closed conformations of gNS2B<sub>47</sub>NS3 and of unlinked  
147 eNS2B<sub>47</sub>NS3, suggesting that the bNS2B<sub>47</sub>NS3 was also in a closed conformation (S1  
148 Table).The data collection and refinement statistics are summarized in Table 1.

149

150 Overall, the NS2B<sub>47</sub>NS3 structures adopt an extended shape where the N terminal protease  
151 and the C terminal helicase domains are loosely connected through a flexible interdomain  
152 linker similar to DENV4 gNS2B<sub>18</sub>NS3 structures (PDB id: 2VBC, 2WHX, 2WZQ) and the  
153 MVEV gNS2B<sub>47</sub>NS3 (PDB id: 2WV9) (Fig 2, S3 Fig) [35, 37, 38]. In all NS2B<sub>47</sub>NS3  
154 crystals, major crystal contacts are formed between the neighbouring helicase domains,  
155 which allow the protease domain to adopt multiple conformations (S4 Fig). From the open to  
156 the closed conformation, the protease domain is translated by about 0.7 Å. From the closed  
157 free enzyme conformation to the closed protease-BPTI conformation, the protease is rotated  
158 by an angle of 52.9°. Although of low resolution, the solvent shells around the protease  
159 domain are discernible confirming that the structure solution is correct (S5 Fig). Compared to  
160 MVEV NS2B<sub>47</sub>NS3 structure, when their helicase domains are superimposed, the protease  
161 domain are rotated by an angle of 177.1° and a translation of 17 Å (S3 Fig) with respect to  
162 the superimposed helicase domain.

163 We captured three free enzyme full length NS2B<sub>47</sub>NS3 structures. For the gNS2B<sub>47</sub>NS3  
164 construct, the NS2B cofactor is captured in both open and closed conformations (Fig 3A, Fig  
165 3B) while for unlinked eNS2B<sub>47</sub>NS3 constructs, the NS2B co-factor is captured only in  
166 closed conformation (Fig 3D, Fig 3E). This indicates that the presence of a flexible glycine  
167 linker increases the population adopting an open conformation. The RMSDs of protease  
168 domain between gNS2B<sub>47</sub>NS3, linked eNS2B<sub>47</sub>NS3, unlinked eNS2B<sub>47</sub>NS3 are less than 0.7  
169 Å for 160 C $\alpha$  atoms. In the free enzyme structures with closed NS2B conformation, the last  
170 10-12 amino acids from the cofactor NS2B, the linker, and the first 20 amino acids of NS3  
171 are flexible. In eNS2B<sub>47</sub>NS3 structures, the NS2B N terminal 8 residues and 3 residues are  
172 flexible for linked and unlinked structures respectively. The electron density of NS2B C-  
173 terminus for free enzyme closed NS2B conformation structures are relatively weak indicating  
174 that the C-terminus of NS2B is dynamic when the active site is not occupied (Fig. 3).



175 Interestingly in the unlinked eNS2B<sub>47</sub>NS3 structure, the NS2B/NS3 cleavage peptide  
176 (VKTQR) is not occupying the substrate binding site, unlike in the similar ZIKV protease  
177 structure, (eZiPro) (PDB accession code 5GJ4) [24]. We also report the crystal structures of  
178 gNS2B<sub>47</sub>NS3 and of unlinked eNS2B<sub>47</sub>NS3 in complex with BPTI. The RMSD between the  
179 two NS3-BPTI structures are 0.44 Å for 618 C $\alpha$  atoms indicating that mode of binding of  
180 BPTI is conserved in both gNS2B<sub>47</sub>NS3 and eNS2B<sub>47</sub>NS3. The protease domain rotates by  
181 52.9° in the NS3-BPTI full length structure to accommodate the BPTI in the crystal. The  
182 detailed interactions between the BPTI and NS2B cofactor and NS3 protease in both  
183 structures are conserved (S6 Fig). The three NS2B<sub>47</sub>NS3 free enzyme structures reveal a  
184 more dynamic NS2B cofactor and NS3 protease compared to the two NS2B<sub>47</sub>NS3-BPTI  
185 structures indicating that substrate binding stabilises the protease (Fig 3, S7 Fig). The  
186 ATPase/helicase domains of both gNS2B<sub>47</sub>NS3 and eNS2B<sub>47</sub>NS3 are identical with RMSD  
187 of less than 0.5 Å. The overall conformation of helicase is similar to the helicase structures  
188 with no NTP or RNA bound except for the residues 461-471 as mentioned before by [38] and  
189 residues 243-253. This surface loop is in close proximity to NS2B  $\beta$  hairpin and to NS3  
190 residues 66PSWAD71, and changes conformation when the BPTI binds to the protease  
191 domain. In eNS2B<sub>47</sub>NS3-BPTI structure, movement of the protease domain results in the P-  
192 loop moving away from these residues.

### 193 **The artificial glycine linker interferes with the protease activity of NS3**

194 Latest studies using biochemical and NMR of flaviviral protease have shown that the flexible  
195 glycine linker affects the enzymatic and binding activities of the protease [23, 24]. To  
196 determine the effect of artificial glycine linker on the enzymatic activities of full length  
197 DENV NS3, we measured the protease activity of eNS2B<sub>47</sub>NS3, gNS2B<sub>47</sub>NS3, and  
198 bNS2B<sub>47</sub>NS3 using Benzoyl-Nle-Lys-Arg-Arg-Aminomethylcoumarin (Bz-NKRR-AMC)  
199 fluorescent substrate [39]. Our enzymatic assays showed that while the glycine linker does

200 not affect the substrate apparent affinity ( $K_m$ ), its presence slows down the rate of catalysis  
201 ( $k_{cat}$ ) (Fig 4A). It is possible that the glycine linker introduces steric hindrance on the NS2B-  
202 NS3 conformational transitions compared to unlinked construct. Although eNS2B<sub>47</sub>NS3 has a  
203 slightly higher  $K_m$  and lower  $k_{cat}$  compared to bNS2B<sub>47</sub>NS3, presence of NS2B/3 cleavage  
204 site does not have the similar inhibitory effect on the protease enzymatic activity as reported  
205 for eZiPro [24]. This could be due to the sub-optimal cleavage site found at NS2B/NS3 in all  
206 DENV serotypes where the P2 residue is glutamine instead of a strongly basic lysine or  
207 arginine found in other flaviviruses. The inhibition activity assays with BPTI and with small  
208 peptidic inhibitor, Benzoyl-Lys-Arg-Arg-H, shows that the half maximal inhibitory value,  
209 IC<sub>50</sub>, was lowest for bivalent bNS2B<sub>47</sub>NS3 (Fig 4B,C) and highest for gNS2B<sub>47</sub>NS3  
210 indicating a slightly tighter association with the former. In addition, the thermal shift assay of  
211 these constructs shows T<sub>m</sub> of gNS2B<sub>47</sub>NS3 is 2°C lower than that of bNS2B<sub>47</sub>NS3 and of  
212 eNS2B<sub>47</sub>NS3, further suggesting that the presence of artificial flexible linker between NS2B  
213 cofactor and NS3 may interfere with the protein stability (S2 Fig).

#### 214 **The kinetics of ATP hydrolysis by full length NS3 constructs are similar**

215 Next, to determine the effect of linkers on the NTPase activities of NS3, we carried out the  
216 NADH coupled ATPase assay for g-, e-, bNS2B<sub>47</sub>NS3 full length constructs. These  
217 constructs show similar ATPase activity demonstrating that the different linkers between  
218 NS2B and NS3 protease do not interfere with NTPase activity of the helicase. The helicase  
219 activity of NS3 requires the energy provided by ATP hydrolysis. The NTP binding site of  
220 helicase is situated right on top of the protease domain while the RNA binding groove of the  
221 helicase domain is spatially separated from the protease domain. Therefore, these different  
222 linker constructs are unlikely to have an effect on the helicase activity if the ATPase activity  
223 is unaffected by the presence of different linkers between NS2B and NS3. To test if the  
224 binding of substrate to the protease domain affect the NTPase activity of helicase domain, we

225 measured the ATPase activity of bNS2B<sub>47</sub>NS3 in the presence and absence of BPTI. The rate  
226 of ATP hydrolysis remains unchanged when BPTI is bound to the protease domain,  
227 demonstrating that the substrate binding on protease domain does not affect the ATPase  
228 activity of helicase domain (Fig 5B). The ATPase activity of DENV4 NS3 helicase was  
229 measured in the presence and absence of BPTI as the control (Fig 5B). Both  $k_{cat}$  and  $K_m$  of  
230 ATP hydrolysis of bNS2B<sub>47</sub>NS3 is slightly slower compared to those of helicase alone, and  
231 hence the catalytic efficiencies of both enzymes are similar (Fig 5B).

232

## 233 **Discussion**

234 Due to absence of NS2B/NS3 crystal structures in closed conformation without substrate or  
235 inhibitor, NS2B was proposed to convert from open and closed conformations upon substrate  
236 binding [11, 12, 25-27]. Early NMR studies of glycine linked DENV and WNV proteases  
237 showed crowded cross peaks due to conformational exchanges [28, 30]. The use of unlinked  
238 constructs in the followed-up NMR studies has improved the spectral quality and backbone  
239 assignment [29, 32]. The unlinked DENV protease constructs are obtained by 1) replacement  
240 of glycine linker with NS2B/NS3 cleavage site (EVKKQR) similar to eNS2B<sub>47</sub>NS3 and 2) by  
241 co-expression of NS2B cofactor peptide and NS3 protease similar to bNS2B<sub>47</sub>NS3 [29, 32].  
242 The NMR studies of these unlinked DENV proteases confirmed that the NS2B cofactor is  
243 predominantly in a closed conformation. Likewise, NMR studies for similar ZIKV protease,  
244 eZiPro, bZiPro, and gZiPro, also showed that the unlinked protease is in a closed  
245 conformation [23, 24, 40]. The presence of glycine linker between NS2B and NS3 shifts the  
246 population towards open NS2B conformation, leading to crowded peaks in NMR spectra,  
247 whereas for unlinked NS2B-NS3 protease, well-resolved spectra are obtained due to the  
248 dominant closed NS2B conformation [29, 32, 40]. Here, we report a series of crystal  
249 structures of DENV4 NS2B<sub>47</sub>NS3 protease-ATPase/helicase which were designed in  
250 different formats and captured as free enzyme and inhibitor-bound complexes. These  
251 structures for the first time clearly confirm that both gNS2B<sub>47</sub>NS3 and unlinked eNS2B<sub>47</sub>NS3  
252 could adopt the closed NS2B conformation in the absence of any substrate or inhibitor. These  
253 results therefore demonstrate that NS2B<sub>47</sub>NS3 protease has a preformed ligand binding site  
254 which becomes further stabilized upon substrate binding. For unlinked eNS2B<sub>47</sub>NS3, the  
255 NS2B/NS3 cleavage site pentapeptide (VKTQR) is not found at the active site, in contrast to  
256 the otherwise comparable protease structure from ZIKV [24]. All the structures reported here  
257 are crystallised under similar crystallization conditions and the major crystal contacts are

258 formed by the helicase domain (S6 Fig). This implies that these constructs could be further  
259 engineered to study the structural properties of NS2B-NS3 protease. The NS2B/3 cleavage  
260 pentapeptide of eNS2B<sub>47</sub>NS3 could be replaced by other cleavage sites present in the viral  
261 polyprotein. Determination of the crystal structures of the above mentioned constructs could  
262 be useful in understanding how different polyprotein cleavage sites bind to the NS2B-NS3  
263 protease. Moreover, the binding loop of BPTI could be mutated as reported by Lin et al and  
264 subsequently co-crystallised with eNS2B<sub>47</sub>NS3 as a scaffold to understand the prime site  
265 interactions between the inhibitor and the protease [41].

266 The protease activity assays of different constructs show that bNS2B<sub>47</sub>NS3 and unlinked  
267 eNS2B<sub>47</sub>NS3 have comparable  $k_{cat}$  while gNS2B<sub>47</sub>NS3 displays the lowest  $k_{cat}$  (Fig 4A). The  
268 ATPase activity of these constructs are similar. This indicates that the lower  $k_{cat}$  in the  
269 protease activity observed for gNS2B<sub>47</sub>NS3 is unlikely due to other factors, such as small  
270 differences in enzyme concentrations or in protein stability (Figure 5A). The flexible glycine  
271 linker might introduce steric hindrance on NS2B dynamics and therefore lower the  $k_{cat}$ . Both  
272 BPTI and peptidomimetic inhibitor, Bz-KRR-H, inhibit the protease activity of all three  
273 constructs with similar range of affinity (Fig 4B,C) indicating that the flexible linker is not  
274 interfering with inhibitor or substrate binding. Hence, it is plausible that the dynamics of  
275 NS2B and NS3 are involved at the post-catalytic/product-release stage rather than simply  
276 during substrate binding. This is in accordance with the single molecule enzymatic studies  
277 performed by Shannon et al, where the  $k_{cat}$  of the enzyme was affected rather than  $K_m$  when  
278 the NS2B-NS3 interactions were disrupted [34]. In agreement with the crystal structure, the  
279 enzymatic activities of eNS2B<sub>47</sub>NS3 are similar to bNS2B<sub>47</sub>NS3 again in contrast to that of  
280 eZiPro and bZiPro [24]. These results suggest that DENV NS2B NS3 cleavage site is  
281 released from the active site upon cleavage, whereas for ZIKV, it remains bound at the active  
282 site. It is possible that different flavivirus are employing the different polyprotein cleavage

283 site and specificity to regulate the protease activity of NS3 *in vivo*. From our structures, we  
284 propose that NS2B/NS3 protease mainly stays in closed conformation regardless of the  
285 presence of a substrate. During polyprotein processing, NS2B is anchored to ER membrane  
286 by N and C-terminal hydrophobic regions [9, 42]. The complete dissociation of NS2B C-  
287 terminus from NS3 protease would not be favourable spatially due to the NS2B membrane  
288 anchorage, whereas stable tight association of whole NS2B cofactor to NS3 will place the  
289 active site of NS3 close to the membrane, shielding it from substrate binding or interfering  
290 with substrate release. Therefore, a rather loosely associated NS2B-cofactor appears to be the  
291 optimal conformation for NS2B-NS3 *in vivo*.

292 In conclusion, we provide crystallographic evidence that the NS2B cofactor loosely assumes  
293 closed conformation around NS3 protease in the full length NS3 in the absence of substrate.  
294 In contrast to the unlinked ZIKV protease, eZiPro, the substrate pocket of eNS2B<sub>47</sub>NS3 is not  
295 occupied and therefore may be useful for co-crystallisation with inhibitors for antiviral drug  
296 discovery. Due to slightly better protease activities, bNS2B<sub>47</sub>NS3 and eNS2B<sub>47</sub>NS3 appear to  
297 be better suited for more sensitive high-throughput screening of potential drugs.

298

299

300

## 301 **Materials and methods**

### 302 **Plasmid preparation**

303 The bacterial expression plasmid containing wild type NS3 linked to cofactor NS2B residues  
304 49—95 was generated by site directed mutagenesis method by inserting NS2B 68-96 to the  
305 gNS2B<sub>18</sub>NS3 construct from Luo et al [35]. The eNS2B<sub>47</sub>NS3 construct was generated by  
306 replacing the glycine linker with residues 126-130 of NS2B C-terminus which is the  
307 enzymatic cleavage site of NS2B/NS3. The eNS2B<sub>47</sub>NS3 L30S F31S and gNS2B<sub>47</sub>NS3 L30S  
308 F31S are mutated from eNS2B<sub>47</sub>NS3 WT and gNS2B<sub>47</sub>NS3 WT by site directed mutagenesis.  
309 The bivalent full length construct (bNS2B<sub>47</sub>NS3) was synthesized by biobasic.

### 310 **Expression and purification**

311 The plasmids containing bNS2B<sub>47</sub>NS3, gNS2B<sub>47</sub>NS3, eNS2B<sub>47</sub>NS3 or mutants were  
312 transformed into *Escherichia coli* BL21(T1R). The transformants were grown in Luria Broth  
313 (LB) medium supplemented with suitable antibiotics (ampicillin (100 mg/L) or kanamycin  
314 (50 mg/L) and chloramphenicol (37 mg/L)), 40-50 mM Potassium Phosphate buffer pH 7.4  
315 and 2.5% glycerol at 37°C until OD<sub>600</sub> of 0.8 was reached. The culture was cooled to 18°C,  
316 subsequently induced with 1mM Isopropyl β-D-1-thiogalactopyranoside, and the proteins  
317 were overexpressed overnight at 18°C shaking at 200 rpm. Cells were harvested after 15  
318 hours by centrifugation at 5000 rpm for 20 minutes at 4°C. Cells were resuspended in lysis  
319 buffer (25 mM 4-(2-hydroxyethyl)-1-piperazineethanesulfonic acid (HEPES), pH 7.5, 500  
320 mM Sodium chloride (NaCl), 5 mM β-Mercaptoethanol (β-ME), 5% glycerol, 10 mM  
321 imidazole). Cells were lysed by passing though NIRO SOAVI PANDA HIGH PRESSURE  
322 HOMOGENIZER at pressure 700-900 bars. The soluble fraction was separated by  
323 centrifugation of the lysate at 40000 RPM for 40 minutes. The soluble proteins were purified  
324 by metal affinity chromatography using Ni-NTA beads (Thermofisher). The N terminal

325 Histidine-tag was cleaved by Tobacco Etch Virus (TEV) protease while the eluted fraction  
326 was dialyzed against Size exclusion chromatography (SEC) buffer (25mM HEPES, pH 7.5,  
327 150 mM NaCl, 2 mM DTT, 5% glycerol) overnight at 4°C. The His-tag cleaved proteins  
328 were further purified by running through HiTrap Heparin HP 5 ml column (GE Healthcare)  
329 and were finally polished with size exclusion chromatography using HiLoad 16/600  
330 Superdex 200 (GE Healthcare).

### 331 **Crystallization, data collection and refinement**

332 Crystals were grown by mixing 1  $\mu$ L of proteins at a concentration of 8.5 mg/ml with 1  $\mu$ L of  
333 precipitant by hanging drop vapour diffusion method (S1 Table). Cluster of thin plate crystals  
334 grew after 2 days of incubation at 20 °C. Crystals are separated into single plates, transferred  
335 to cryoprotected reservoir solution with 20% glycerol and cooled down to 100 K in liquid  
336 nitrogen before mounting.

337 Diffraction intensities were recorded on PILATUS 2M-F detector at PXIII beamline at the  
338 Swiss Light Source, Paul Scherrer Institut, Villigen, Switzerland and on ADSC Quantum  
339 210r Detector at MX1 beamline at Australian Synchrotron. Diffraction intensities were  
340 integrated using iMOSFLM or XDS [43-45]. Scaling and merging of the intensities were  
341 done using POINTLESS and AIMLESS from CCP4 suite [46-49]. Data collection statistics  
342 are summarized in (Table 1). For gNS2B<sub>47</sub>NS3 and eNS2B<sub>47</sub>NS3 unlinked datasets, the  
343 multiplicity was higher due to the smaller oscillation of the  $\Phi$ .

344 The solution for gNS2B<sub>47</sub>NS3 with BPTI was solved using PHASER MR (CCP4 suite) using  
345 2VBC as search model [37]. The solutions for full length NS3 (gNS2B<sub>47</sub>NS3 and  
346 eNS2B<sub>47</sub>NS3) were solved by using PHASER MR (CCP4 suite) using gNS2B<sub>47</sub>NS3 free  
347 enzyme structure as search model. The dataset for unlinked eNS2B<sub>47</sub>NS3 has ice rings and  
348 therefore the diffractions spots at the resolution shells around 3.4 Å were removed to reduce



349 the noise. This has resulted in lowered completeness of the overall dataset. The structure  
350 solutions were subject to rounds of refinement using Phenix.refine program and manual  
351 refinement using WinCoot[50-54]. Rotational and translational movements of domains were  
352 carried out using DynDom (CCP4 suites) and Superpose (CCP4 suites)[55, 56]. Figs were  
353 generated using Pymol and electron density maps were generated using FFT (CCP4  
354 suites)[57, 58]

### 355 **Protease activity assay**

356 The protease activity assays were carried out using 7-amino-4-methylcoumarin (AMC)  
357 fluorophore, Benzyonyl-Nle-Lys-Arg-Arg-AMC (Peptide Institute, Japan) modified from  
358 [39]. The Bz-NKRR-AMC substrate with starting concentration of 300  $\mu$ M was serially  
359 diluted in assay buffer (20 mM Tris hydrochloric acid, pH 8.5, 10% glycerol, 0.01% Triton  
360 X-100, 2 mM DTT) and added to Corning® 96 Well black plates with 3 nM protein in same  
361 buffer. Assays were carried out as duplicates or triplicates at 37°C. The rate of AMC released  
362 was monitored at Synergy™ HTX Multi-Mode Microplate Reader at excitation wavelength  
363 380 nm and emission wavelength 460 nm over 5-10 minutes at 1 minute intervals. To  
364 determine the amount of AMC released, standard AMC curve was plotted with over different  
365 concentrations of AMC (data not shown). Initial velocities were calculated using linear  
366 regression function using GraphPad Prism version 5.0 for Windows. The relative  
367 fluorescence units (RFU) were converted to amount of AMC using the standard curve. Data  
368 were analysed and plotted using Michalis-Menten equation with GraphPad Prism version  
369 5.00 for Windows (GraphPad Software, San Diego, California, USA).

### 370 **Protease inhibition assay**

371 The protease inhibition assays were carried out using the same substrate used in enzymatic  
372 assay at 30  $\mu$ M concentrations. The inhibitors of different concentrations were added to the

373 wells with 3 nM of proteins and were incubated for 30 minutes at room temperature. The  
374 reaction was initiated by addition of 30  $\mu$ M substrate and initial velocities were measured at 1  
375 minute intervals at 37°C for 10 minutes. Data were analysed using function Log inhibitor vs  
376 normalized response function in GraphPad Prism.

### 377 **ATPase assay**

378 ATPase activity assay was carried out based on Kiianitsa et al[59]. 50 nM of enzymes were  
379 incubated in assay buffer (25 mM MOPS pH 7.4, 150 mM potassium chloride, 2 mM DTT,  
380 0.01% Triton X-100) with 50  $\mu$ M of BPTI for an hour in Corning® 96 Well clear plates.  
381 NADH mixture (NADH 1mM, Phosphoenol pyruvate 2.5mM Pyruvate Kinase 500 U/ml and  
382 lactic dehydrogenase 100 U/ml in ATPase assay buffer) was added to reaction and incubated  
383 for 30 minutes more. Reaction was started by addition of various ATP concentrations.  
384 Depletion of NADH was measured by change in absorbance at 340 nm and was plotted  
385 against time using Cytation 3 Multitmode plate reader (BioTek). After determining the path  
386 length, molar extinction coefficient for the given path length ( $K_{\text{path}}$ ) was calculated. Initial  
387 velocities were calculated using linear regression function using GraphPad Software version  
388 5.0 for Windows. Data were plotted using Michaelis-Menten equation in GraphPad Prism.

### 389 **Thermal shift assays**

390 The Thermofluor assay was carried out as described previously [60]. The samples contained  
391 10  $\mu$ M protein and 5x SYPRO Orange dye in buffer containing 20 mM HEPES pH 7.5, 150  
392 mM NaCl, 2 mM DTT and 5% glycerol. The samples were subject to temperature increments  
393 of 1°C from 20°C to 95°C over 20 minutes using real-time PCR machine Bio-Rad CFX96.  
394 The fluorescence intensities were recorded and analysed using GraphPad Prism. The melting  
395 curves were generated using Boltzmann-sigmoidal function.

396

397 **Acknowledgment**

398 We thank scientists from Australian Light Source MX beam-line and Swiss Light Source PX  
399 beam-line for their help with diffraction data collection. This work was supported by (1) the  
400 start-up grant to DL lab from Lee Kong Chian School of Medicine, Nanyang Technological  
401 University, (2) Ministry of Education grant MOE2016-T2-2-097 to DL lab, (3) National  
402 Medical Research Council grant CBRG14May051 to JL, (4) National Medical Research  
403 Council grant NMRC/CBRG/0103/2016 to SV lab, (5) National Research Foundation grant  
404 NRF2016NRF-CRP001-063. Ms. Wint Wint Phoo is supported by Nanyang Research  
405 Scholarship, Nanyang Technological University.

406

## 407 References

- 408 1. Cao-Lormeau, V.M., et al., *Guillain-Barre Syndrome outbreak associated with Zika virus*  
409 *infection in French Polynesia: a case-control study*. Lancet, 2016. **387**(10027): p. 1531-1539.
- 410 2. Brasil, P., et al., *Zika Virus Infection in Pregnant Women in Rio de Janeiro*. N Engl J Med,  
411 2016. **375**(24): p. 2321-2334.
- 412 3. Bell, B.P., C.A. Boyle, and L.R. Petersen, *Preventing Zika Virus Infections in Pregnant Women:*  
413 *An Urgent Public Health Priority*. Am J Public Health, 2016. **106**(4): p. 589-90.
- 414 4. Chambers, T.J., et al., *Flavivirus Genome Organization, Expression, and Replication*. Annual  
415 Review of Microbiology, 1990. **44**: p. 649-688.
- 416 5. Lindenbach, B.D. and C.M. Rice, *Molecular biology of flaviviruses*. Adv Virus Res, 2003. **59**: p.  
417 23-61.
- 418 6. Lescar, J., et al., *Towards the design of antiviral inhibitors against flaviviruses: the case for*  
419 *the multifunctional NS3 protein from Dengue virus as a target*. Antiviral Res, 2008. **80**(2): p.  
420 94-101.
- 421 7. Luo, D., S.G. Vasudevan, and J. Lescar, *The flavivirus NS2B-NS3 protease-helicase as a target*  
422 *for antiviral drug development*. Antiviral Res, 2015. **118**: p. 148-158.
- 423 8. Ma, Y., et al., *NS3 helicase domains involved in infectious intracellular hepatitis C virus*  
424 *particle assembly*. J Virol, 2008. **82**(15): p. 7624-39.
- 425 9. Falgout, B., et al., *Both nonstructural proteins NS2B and NS3 are required for the proteolytic*  
426 *processing of dengue virus nonstructural proteins*. J Virol, 1991. **65**(5): p. 2467-75.
- 427 10. Chambers, T.J., A. Grakoui, and C.M. Rice, *Processing of the yellow fever virus nonstructural*  
428 *polyprotein: a catalytically active NS3 proteinase domain and NS2B are required for*  
429 *cleavages at dibasic sites*. J Virol, 1991. **65**(11): p. 6042-50.
- 430 11. Noble, C.G., et al., *Ligand-bound structures of the dengue virus protease reveal the active*  
431 *conformation*. J Virol, 2012. **86**(1): p. 438-46.
- 432 12. Erbel, P., et al., *Structural basis for the activation of flaviviral NS3 proteases from dengue and*  
433 *West Nile virus*. Nat Struct Mol Biol, 2006. **13**(4): p. 372-3.
- 434 13. Incicco, J.J., et al., *Steady-state NTPase activity of Dengue virus NS3: number of catalytic*  
435 *sites, nucleotide specificity and activation by ssRNA*. PLoS One, 2013. **8**(3): p. e58508.
- 436 14. Li, H., et al., *The serine protease and RNA-stimulated nucleoside triphosphatase and RNA*  
437 *helicase functional domains of dengue virus type 2 NS3 converge within a region of 20 amino*  
438 *acids*. J Virol, 1999. **73**(4): p. 3108-16.
- 439 15. Benarroch, D., et al., *The RNA helicase, nucleotide 5'-triphosphatase, and RNA 5'-*  
440 *triphosphatase activities of Dengue virus protein NS3 are Mg<sup>2+</sup>-dependent and require a*  
441 *functional Walker B motif in the helicase catalytic core*. Virology, 2004. **328**(2): p. 208-18.
- 442 16. Rupp, D. and R. Bartenschlager, *Targets for antiviral therapy of hepatitis C*. Semin Liver Dis,  
443 2014. **34**(1): p. 9-21.
- 444 17. Low, J.G., E.E. Ooi, and S.G. Vasudevan, *Current Status of Dengue Therapeutics Research and*  
445 *Development*. J Infect Dis, 2017. **215**(suppl\_2): p. S96-S102.
- 446 18. Kaptein, S.J. and J. Neyts, *Towards antiviral therapies for treating dengue virus infections*.  
447 Curr Opin Pharmacol, 2016. **30**: p. 1-7.
- 448 19. Chambers, T.J., et al., *Evidence That the N-Terminal Domain of Nonstructural Protein Ns3*  
449 *from Yellow-Fever Virus Is a Serine Protease Responsible for Site-Specific Cleavages in the*  
450 *Viral Polyprotein*. Proceedings of the National Academy of Sciences of the United States of  
451 America, 1990. **87**(22): p. 8898-8902.

- 452 20. Leung, D., et al., *Activity of recombinant dengue 2 virus NS3 protease in the presence of a*  
453 *truncated NS2B co-factor, small peptide substrates, and inhibitors*. J Biol Chem, 2001.  
454 **276**(49): p. 45762-71.
- 455 21. Noble, C.G. and P.Y. Shi, *Structural biology of dengue virus enzymes: towards rational design*  
456 *of therapeutics*. Antiviral Res, 2012. **96**(2): p. 115-26.
- 457 22. Robin, G., et al., *Structure of West Nile virus NS3 protease: ligand stabilization of the*  
458 *catalytic conformation*. J Mol Biol, 2009. **385**(5): p. 1568-77.
- 459 23. Zhang, Z., et al., *Crystal structure of unlinked NS2B-NS3 protease from Zika virus*. Science,  
460 2016. **354**(6319): p. 1597-1600.
- 461 24. Phoo, W.W., et al., *Structure of the NS2B-NS3 protease from Zika virus after self-cleavage*.  
462 Nat Commun, 2016. **7**: p. 13410.
- 463 25. Chandramouli, S., et al., *Serotype-specific structural differences in the protease-cofactor*  
464 *complexes of the dengue virus family*. J Virol, 2010. **84**(6): p. 3059-67.
- 465 26. Hammamy, M.Z., et al., *Development and characterization of new peptidomimetic inhibitors*  
466 *of the West Nile virus NS2B-NS3 protease*. ChemMedChem, 2013. **8**(2): p. 231-41.
- 467 27. Aleshin, A.E., et al., *Structural evidence for regulation and specificity of flaviviral proteases*  
468 *and evolution of the Flaviviridae fold*. Protein Sci, 2007. **16**(5): p. 795-806.
- 469 28. de la Cruz, L., et al., *Binding of low molecular weight inhibitors promotes large*  
470 *conformational changes in the dengue virus NS2B-NS3 protease: fold analysis by*  
471 *pseudocontact shifts*. J Am Chem Soc, 2011. **133**(47): p. 19205-15.
- 472 29. de la Cruz, L., et al., *Binding mode of the activity-modulating C-terminal segment of NS2B to*  
473 *NS3 in the dengue virus NS2B-NS3 protease*. FEBS J, 2014. **281**(6): p. 1517-33.
- 474 30. Su, X.C., et al., *NMR analysis of the dynamic exchange of the NS2B cofactor between open*  
475 *and closed conformations of the West Nile virus NS2B-NS3 protease*. PLoS Negl Trop Dis,  
476 2009. **3**(12): p. e561.
- 477 31. Su, X.C., et al., *NMR study of complexes between low molecular mass inhibitors and the West*  
478 *Nile virus NS2B-NS3 protease*. FEBS J, 2009. **276**(15): p. 4244-55.
- 479 32. Kim, Y.M., et al., *NMR analysis of a novel enzymatically active unlinked dengue NS2B-NS3*  
480 *protease complex*. J Biol Chem, 2013. **288**(18): p. 12891-900.
- 481 33. Zhang, Z.Z., et al., *Crystal structure of unlinked NS2B-NS3 protease from Zika virus*. Science,  
482 2016. **354**(6319): p. 1597-1600.
- 483 34. Shannon, A.E., et al., *Product release is rate-limiting for catalytic processing by the Dengue*  
484 *virus protease*. Sci Rep, 2016. **6**: p. 37539.
- 485 35. Luo, D., et al., *Crystal structure of the NS3 protease-helicase from dengue virus*. J Virol, 2008.  
486 **82**(1): p. 173-83.
- 487 36. Xu, T., et al., *Structure of the Dengue virus helicase/nucleoside triphosphatase catalytic*  
488 *domain at a resolution of 2.4 Å*. J Virol, 2005. **79**(16): p. 10278-88.
- 489 37. Luo, D., et al., *Flexibility between the protease and helicase domains of the dengue virus NS3*  
490 *protein conferred by the linker region and its functional implications*. J Biol Chem, 2010.  
491 **285**(24): p. 18817-27.
- 492 38. Assenberg, R., et al., *Crystal structure of a novel conformational state of the flavivirus NS3*  
493 *protein: implications for polyprotein processing and viral replication*. J Virol, 2009. **83**(24): p.  
494 12895-906.

- 495 39. Li, J., et al., *Functional profiling of recombinant NS3 proteases from all four serotypes of*  
496 *dengue virus using tetrapeptide and octapeptide substrate libraries.* J Biol Chem, 2005.  
497 **280**(31): p. 28766-74.
- 498 40. Li, Y., et al., *Structural characterization of the linked NS2B-NS3 protease of Zika virus.* FEBS  
499 Lett, 2017. **591**(15): p. 2338-2347.
- 500 41. Lin, K.H., et al., *Dengue Virus NS2B/NS3 Protease Inhibitors Exploiting the Prime Side.* J Virol,  
501 2017. **91**(10).
- 502 42. Clum, S., K.E. Ebner, and R. Padmanabhan, *Cotranslational membrane insertion of the serine*  
503 *proteinase precursor NS2B-NS3(Pro) of dengue virus type 2 is required for efficient in vitro*  
504 *processing and is mediated through the hydrophobic regions of NS2B.* J Biol Chem, 1997.  
505 **272**(49): p. 30715-23.
- 506 43. Battye, T.G., et al., *iMOSFLM: a new graphical interface for diffraction-image processing with*  
507 *MOSFLM.* Acta Crystallogr D Biol Crystallogr, 2011. **67**(Pt 4): p. 271-81.
- 508 44. Kabsch, W., *Integration, scaling, space-group assignment and post-refinement.* Acta  
509 Crystallogr D Biol Crystallogr, 2010. **66**(Pt 2): p. 133-44.
- 510 45. Kabsch, W., *Xds.* Acta Crystallogr D Biol Crystallogr, 2010. **66**(Pt 2): p. 125-32.
- 511 46. Evans, P.R., *An introduction to data reduction: space-group determination, scaling and*  
512 *intensity statistics.* Acta Crystallogr D Biol Crystallogr, 2011. **67**(Pt 4): p. 282-92.
- 513 47. Evans, P.R. and G.N. Murshudov, *How good are my data and what is the resolution?* Acta  
514 Crystallogr D Biol Crystallogr, 2013. **69**(Pt 7): p. 1204-14.
- 515 48. Potterton, E., et al., *A graphical user interface to the CCP4 program suite.* Acta Crystallogr D  
516 Biol Crystallogr, 2003. **59**(Pt 7): p. 1131-7.
- 517 49. Winn, M.D., et al., *Overview of the CCP4 suite and current developments.* Acta Crystallogr D  
518 Biol Crystallogr, 2011. **67**(Pt 4): p. 235-42.
- 519 50. Emsley, P. and K. Cowtan, *Coot: model-building tools for molecular graphics.* Acta  
520 Crystallographica Section D-Biological Crystallography, 2004. **60**: p. 2126-2132.
- 521 51. Emsley, P., et al., *Features and development of Coot.* Acta Crystallographica Section D, 2010.  
522 **66**(4): p. 486-501.
- 523 52. Adams, P.D., et al., *PHENIX: a comprehensive Python-based system for macromolecular*  
524 *structure solution.* Acta Crystallogr D Biol Crystallogr, 2010. **66**(Pt 2): p. 213-21.
- 525 53. Afonine, P.V., et al., *Towards automated crystallographic structure refinement with*  
526 *phenix.refine.* Acta Crystallogr D Biol Crystallogr, 2012. **68**(Pt 4): p. 352-67.
- 527 54. Headd, J.J., et al., *Use of knowledge-based restraints in phenix.refine to improve*  
528 *macromolecular refinement at low resolution.* Acta Crystallogr D Biol Crystallogr, 2012. **68**(Pt  
529 4): p. 381-90.
- 530 55. Hayward, S. and R.A. Lee, *Improvements in the analysis of domain motions in proteins from*  
531 *conformational change: DynDom version 1.50.* J Mol Graph Model, 2002. **21**(3): p. 181-3.
- 532 56. Kotlovyy, V., W.L. Nichols, and L.F. Ten Eyck, *Protein structural alignment for detection of*  
533 *maximally conserved regions.* Biophys Chem, 2003. **105**(2-3): p. 595-608.
- 534 57. DeLano, W.L., *PyMOL molecular viewer: Updates and refinements.* Abstracts of Papers of the  
535 American Chemical Society, 2009. **238**.
- 536 58. DeLano, W.L., *Use of PYMOL as a communications tool for molecular science.* Abstracts of  
537 Papers of the American Chemical Society, 2004. **228**: p. U313-U314.

- 538 59. Kiiianitsa, K., J.A. Solinger, and W.D. Heyer, *NADH-coupled microplate photometric assay for*  
539 *kinetic studies of ATP-hydrolyzing enzymes with low and high specific activities*. Anal  
540 Biochem, 2003. **321**(2): p. 266-71.
- 541 60. Lo, M.C., et al., *Evaluation of fluorescence-based thermal shift assays for hit identification in*  
542 *drug discovery*. Anal Biochem, 2004. **332**(1): p. 153-9.

543

544

545

**Table 1: Data collection and refinement statistics**

| <b>Table 1</b>                                | gNS2B <sub>47</sub> NS3<br>(Open)   | gNS2B <sub>47</sub> NS3<br>(Closed) | Unlinked<br>eNS2B <sub>47</sub> NS3 | gNS2B <sub>47</sub> NS3 +<br>BPTI | Unlinked<br>eNS2B <sub>47</sub> NS3 +<br>BPTI |
|-----------------------------------------------|-------------------------------------|-------------------------------------|-------------------------------------|-----------------------------------|-----------------------------------------------|
| <b>Data Collection Statistics</b>             |                                     |                                     |                                     |                                   |                                               |
| <b>Wavelength (Å)</b>                         | 1.00                                | 1.0004                              | 1.0428                              | 1.079                             | 1.033                                         |
| <b>Resolution range (Å)</b>                   | 45.05 – 2.50<br>(2.60 – 2.51)       | 45.41 - 3.10<br>(3.21 - 3.10)       | 42.97 - 3.2<br>(3.31 - 3.2)         | 47.69 - 2.49 (2.58<br>- 2.49)     | 45 - 2.6 (2.69 -<br>2.60)                     |
| <b>Space group</b>                            | P 1 2 <sub>1</sub> 1                | P 1 2 <sub>1</sub> 1                | P 1 2 <sub>1</sub> 1                | P 1 2 <sub>1</sub> 1              | P 1 2 <sub>1</sub> 1                          |
| <b>Unit cell a, b, c,<br/>α, β, γ (Å) (°)</b> | 52.78 86.81<br>75.90<br>90 93.07 90 | 52.92 88.72<br>81.30 90 93.08<br>90 | 52.9 88.77 1.45<br>90 93.85 90      | 53.06 85.66 85.47<br>90 97.92 90  | 53.02 87.49 86.46<br>90 98.25 90              |
| <b>Total number of reflections</b>            | 277395 (12526)                      | 52184 (4835)                        | 119885 (14348)                      | 91122 (7831)                      | 94028 (9737)                                  |
| <b>Unique reflections</b>                     | 22654 (1294)                        | 13697 (1295)                        | 10632 (1279)                        | 25250 (2458)                      | 24137 (2426)                                  |
| <b>Multiplicity</b>                           | 13.1 (9.7)                          | 3.8 (3.7)                           | 11.2 (11.2)                         | 3.5 (3.2)                         | 3.9 (4.0)                                     |
| <b>Completeness (%)</b>                       | 96.26 (90.82)                       | 99.40 (96.00)                       | 84.79 (99.69)                       | 95.59 (92.97)                     | 99.77 (99.88)                                 |
| <b>I/σI</b>                                   | 5.5 (2.2)                           | 13.85 (2.15)                        | 6.9 (1.4)                           | 14.03 (1.87)                      | 11.01 (1.43)                                  |
| <b>Wilson B-factor (Å<sup>2</sup>)</b>        | 40.99                               | 73.65                               | 85.08                               | 51.41                             | 54.01                                         |
| <b><sup>a</sup>R<sub>merge</sub></b>          | 0.097 (0.390)                       | 0.0941 (0.5649)                     | 0.078 (0.362)                       | 0.084 (0.586)                     | 0.0974 (0.9823)                               |
| <b>Refinement Statistics</b>                  |                                     |                                     |                                     |                                   |                                               |
| <b><sup>b</sup>R<sub>work</sub> (%)</b>       | 0.1976 (0.2791)                     | 0.2319 (0.3528)                     | 0.2099 (0.2901)                     | 0.2276 (0.3248)                   | 0.2107 (0.3453)                               |
| <b><sup>c</sup>R<sub>free</sub> (%)</b>       | 0.2458 (0.3887)                     | 0.2782 (0.3954)                     | 0.2475 (0.3362)                     | 0.2776 (0.3842)                   | 0.2413 (0.3888)                               |
| <b>Number of non-hydrogen<br/>atoms</b>       | 4863                                | 4766                                | 4686                                | 5050                              | 5351                                          |
| <b>Macromolecules</b>                         | 4733                                | 4766                                | 4686                                | 4940                              | 5297                                          |
| <b>Ligand</b>                                 | 6                                   |                                     |                                     |                                   | 6                                             |
| <b>Water</b>                                  | 124                                 |                                     |                                     | 110                               | 48                                            |
| <b>RMSD (bonds) (Å)</b>                       | 0.004                               | 0.002                               | 0.004                               | 0.004                             | 0.003                                         |
| <b><sup>d</sup>RMSD (angles) (°)</b>          | 0.85                                | 0.65                                | 0.79                                | 0.82                              | 0.73                                          |
| <b>Ramachandran favoured<br/>(%)</b>          | 94                                  | 93                                  | 93                                  | 91                                | 93                                            |
| <b>Ramachandran allowed (%)</b>               | 5.5                                 | 6.52                                | 6.84                                | 8.03                              | 6.41                                          |
| <b>Ramachandran outliers (%)</b>              | 0.5                                 | 0.48                                | 0.16                                | 0.97                              | 0.59                                          |
| <b>Clashscore</b>                             | 7.98                                | 5.57                                | 9.94                                | 9.26                              | 7.81                                          |
| <b>Average B-factor (Å<sup>2</sup>)</b>       | 53.57                               | 82.10                               | 101.80                              | 74.86                             | 75.70                                         |
| <b>NS2B</b>                                   | 79.78                               | 127.87                              | 183.73                              | 110.55                            | 110.39                                        |
| <b>NS3</b>                                    | 53.16                               | 66.90                               | 97.47                               | 70.61                             | 71.50                                         |
| <b>BPTI</b>                                   |                                     |                                     |                                     | 100.82                            | 98.78                                         |
| <b>Solvent</b>                                | 44.32                               |                                     |                                     | 56.96                             | 58.32                                         |

546 The numbers in brackets refer to the highest resolution shell.

547 <sup>a</sup>  $R_{\text{merge}} = \sum |I_j - \langle I \rangle| / \sum I_j$ , where  $I_j$  is the intensity of an individual reflection, and  $\langle I \rangle$  is the  
548 average intensity of that reflection.

549 <sup>b</sup>  $R_{\text{work}} = \sum ||F_o| - |F_c|| / \sum |F_c|$ , where  $F_o$  denotes the observed structure factor amplitude, and  $F_c$   
550 the structure factor amplitude calculated from the model.

551 <sup>c</sup>  $R_{\text{free}}$  is as for  $R_{\text{work}}$  but calculated with 5% of randomly chosen reflections omitted from the  
552 refinement.

553 <sup>d</sup>RMSD = root mean square deviations



554 **Figure titles and legends**

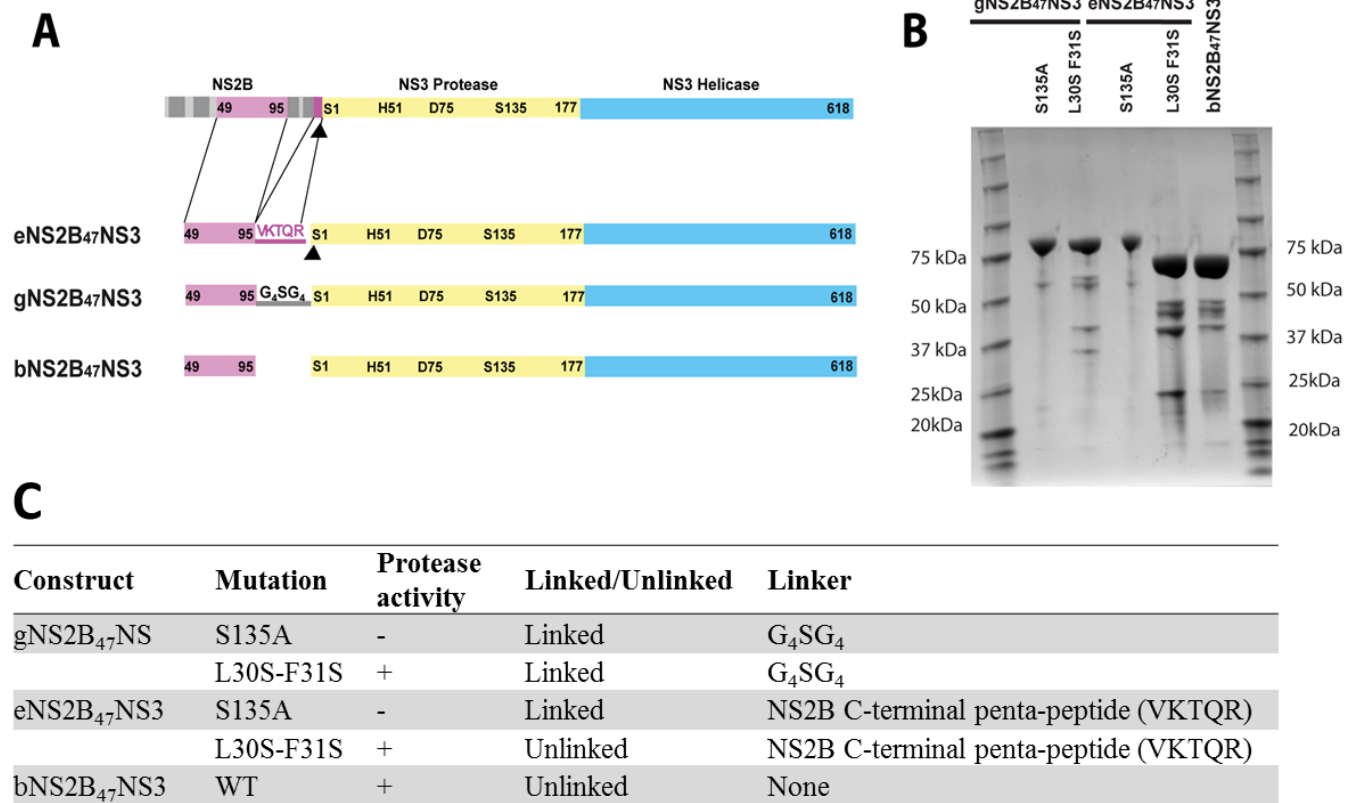

555

556 **Fig 1. Construct design and crystal structures of DENV4 NS3.** (A) Graphical  
 557 representations of natural NS2B-NS3 as part of the native polyprotein, and the constructs  
 558 discussed in this work. Construct-boundaries and catalytic residues are indicated. NS2B  
 559 cofactor is depicted in magenta (hydrophilic region) and gray (transmembrane regions). NS3  
 560 is represented in yellow for protease domain and cyan for helicase domain. Black arrowhead  
 561 indicates site of cleavage by NS3. For eNS2B<sub>47</sub>NS3 construct, five amino acid residues from  
 562 NS2B/NS3 cleavage site is inserted between NS2B cofactor and NS3. For gNS2B<sub>47</sub>NS3  
 563 construct, conventional artificial flexible linker (G<sub>4</sub>SG<sub>4</sub>) is used to covalently link the NS2B  
 564 cofactor and NS3. For bNS2B<sub>47</sub>NS3, each T7 promoter site is cloned in front of NS2B and  
 565 NS3 resulting in co-expression of the cofactor NS2B and NS3. (B) SDS-PAGE analysis of  
 566 purified NS3 proteins. The first and last lanes are molecular weight markers. The construct  
 567 names and mutations are indicated. The eNS2B<sub>47</sub>NS3 L30S F31S and bNS2B<sub>47</sub>NS3 migrated

568 to similar size on the gel indicating the complete proteolysis between NS2B cofactor and NS3  
569 for the eNS2B<sub>47</sub>NS3 constructs. (C) The constructs are listed in the table with the types of  
570 mutation, active/inactive protease, and the type of linker between NS2B and NS3.

571

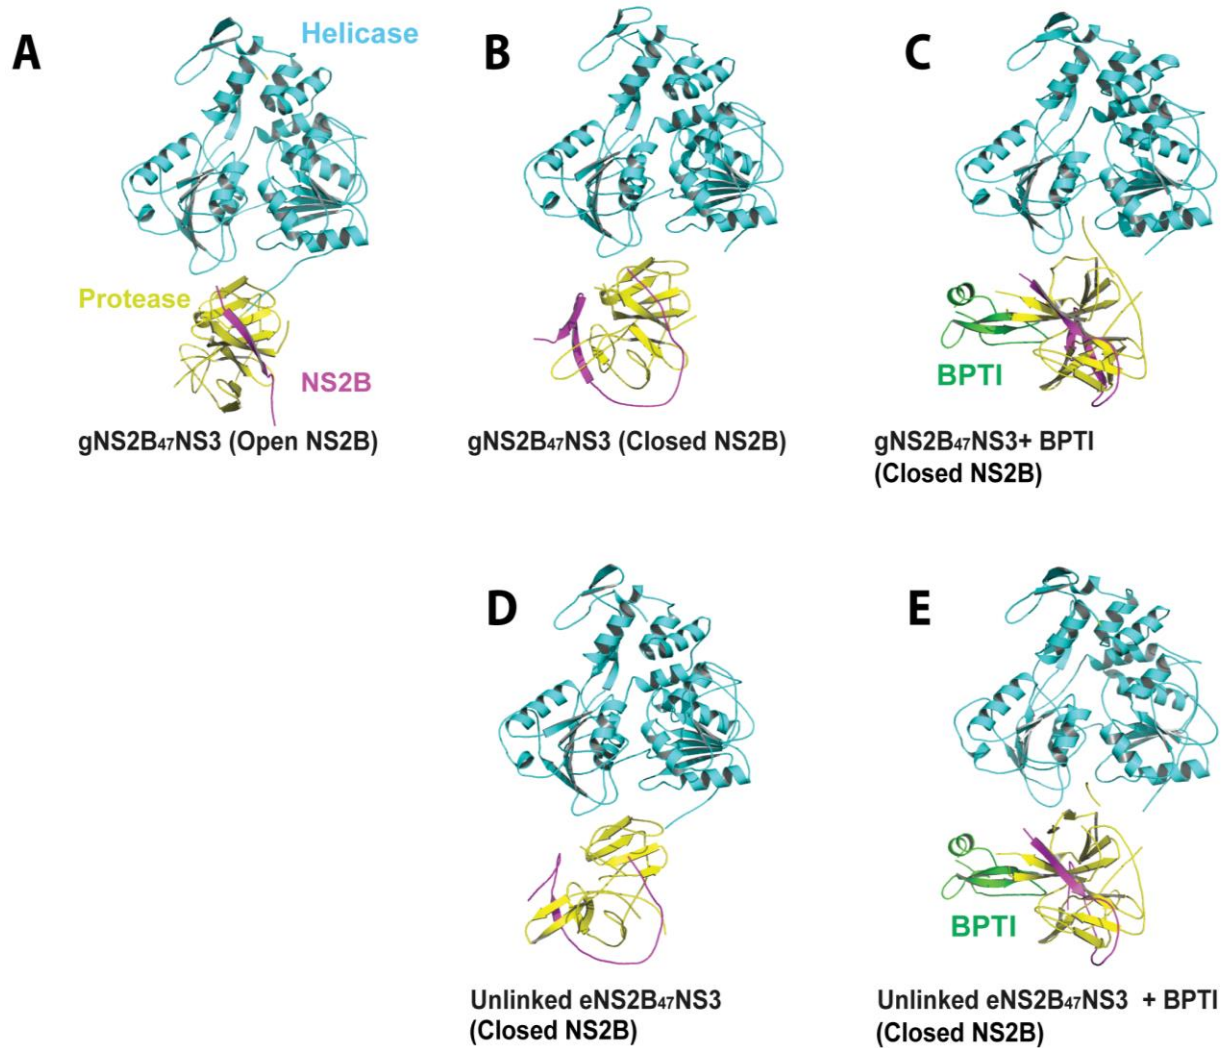

572

573 **Fig 2. Crystal structures of NS2B<sub>47</sub>NS3 in apo-state and in complex with BPTI.** The

574 individual domains of NS3 and BPTI are labelled. The NS3 helicase domain is coloured in

575 cyan, the NS3 protease in yellow and NS2B cofactor region in magenta. All five structures

576 adopt an elongated conformation similar to previous NS2B<sub>18</sub>-NS3 full-length structure by

577 Luo et al (1). The open and closed state of NS2B for each structure is stated together with the

578 construct name. Both open NS2B and closed NS2B conformations are observed for

579 gNS2B<sub>47</sub>NS3 free enzyme structures (A) and (B). (C) gNS2B<sub>47</sub>NS3 in complex with BPTI.

580 (D) Unlinked eNS2B<sub>47</sub>NS3 structure is shown with the closed NS2B cofactor without a

581 substrate/inhibitor. (E) Similar to gNS2B<sub>47</sub>NS3-BPTI structure, the NS2B C-terminus is in

582 closed conformation for unlinked eNS2B<sub>47</sub>NS3-BPTI structure.

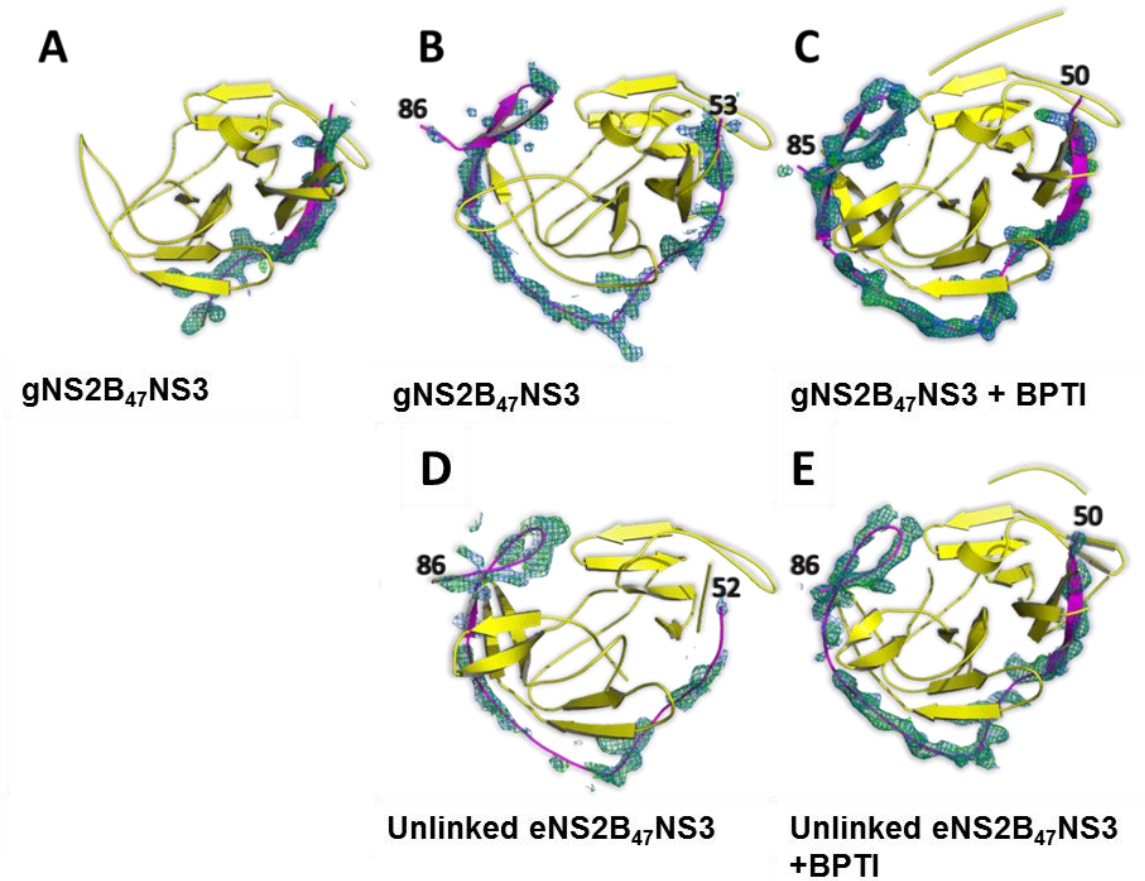

583

584 **Fig 3. Different conformations of NS2B cofactor in full length NS3 structures.** The NS2B  
585 is shown in magenta and NS3 in yellow. The  $2F_o-F_c$  map contoured at a level of  $1 \sigma$  is shown  
586 in blue and  $F_o-F_c$  map contoured at  $3 \sigma$  is shown in green, where the NS2B was omitted in the  
587 calculation. (A, B) The protease domain of gNS2B<sub>47</sub>NS3 with cofactor NS2B shows that  
588 NS2B could adopt both open and closed conformations without the inhibitor. (C, E) When  
589 the protease is in complex with BPTI, NS2B cofactor is in closed conformation for both  
590 gNS2B<sub>47</sub>NS3 (C) and eNS2B<sub>47</sub>NS3 structures (F). (D) The NS2B cofactor of unlinked  
591 eNS2B<sub>47</sub>NS3 protease stays in a closed conformation without inhibitor. The electron density  
592 maps of NS2B in free enzyme structure is weaker than that of NS2B in protease-BPTI  
593 complex structure indicating that without substrate NS2B is dynamic.

594

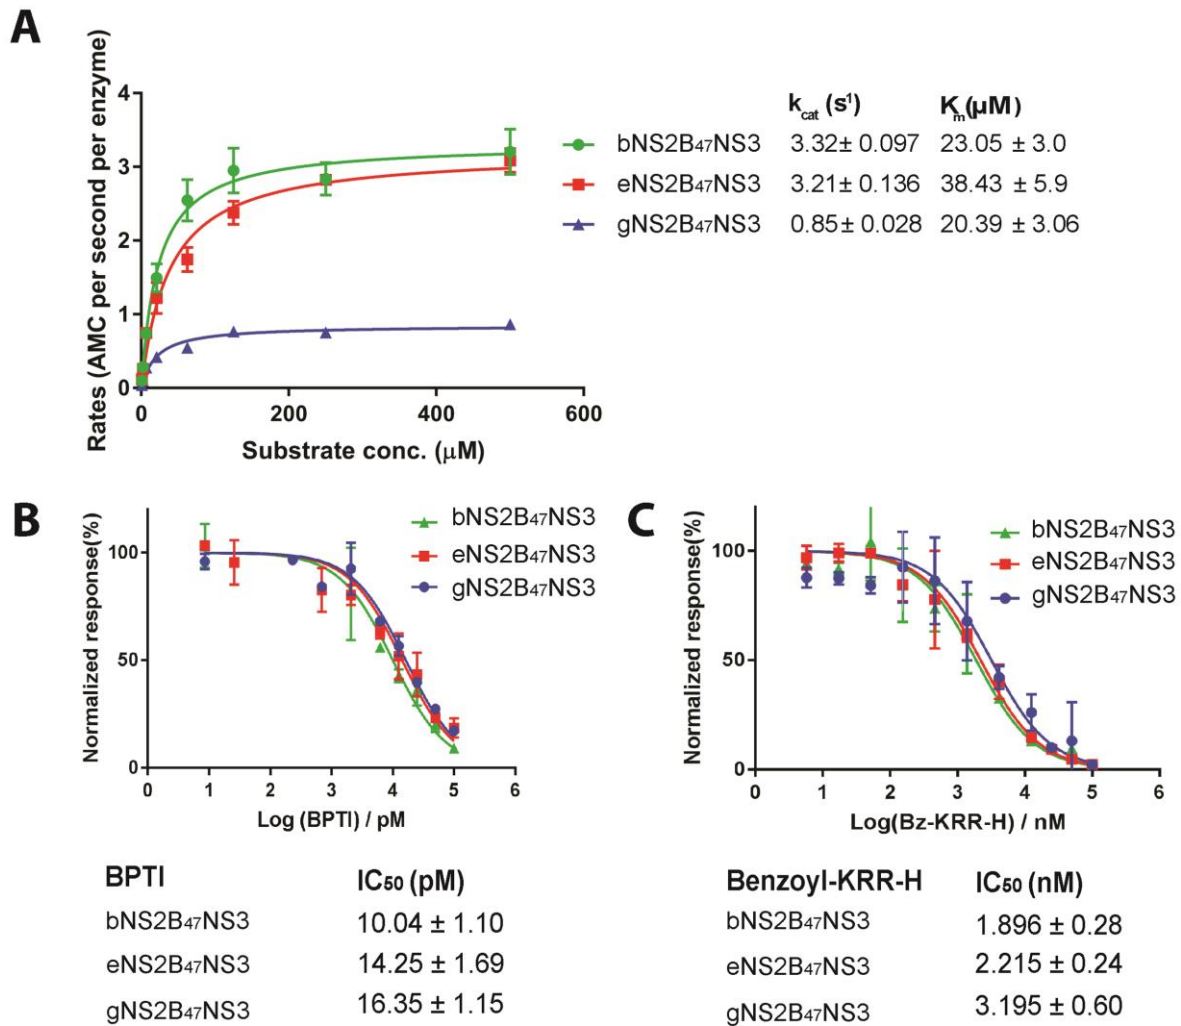

595

596 **Fig 4. Characterisation of protease activity of NS3 full length constructs with different**

597 **linkers.** (A) Protease activity of bNS2B<sub>47</sub>NS3, eNS2B<sub>47</sub>NS3 L30S F31S and

598 gD4NS2B<sub>47</sub>NS3 L30S F31S against Benzoyl-Nle-Lys-Arg-Arg-AMC substrate. (B,C) Half

599 maximal inhibition efficiencies (IC<sub>50</sub>) of BPTI and Benzoyl-Lys-Arg-Arg-H against

600 NS2B<sub>47</sub>NS3 constructs were determined. The gNS2B<sub>47</sub>NS3 showed lowest  $k_{cat}$  and  $K_m$ . The

601 presence of NS2B-NS3 cleavage site does not affect the enzymatic activities of full length

602 NS3 as seen by comparable  $k_{cat}$ s between bNS2B<sub>47</sub>NS3 and eNS2B<sub>47</sub>NS3.

603

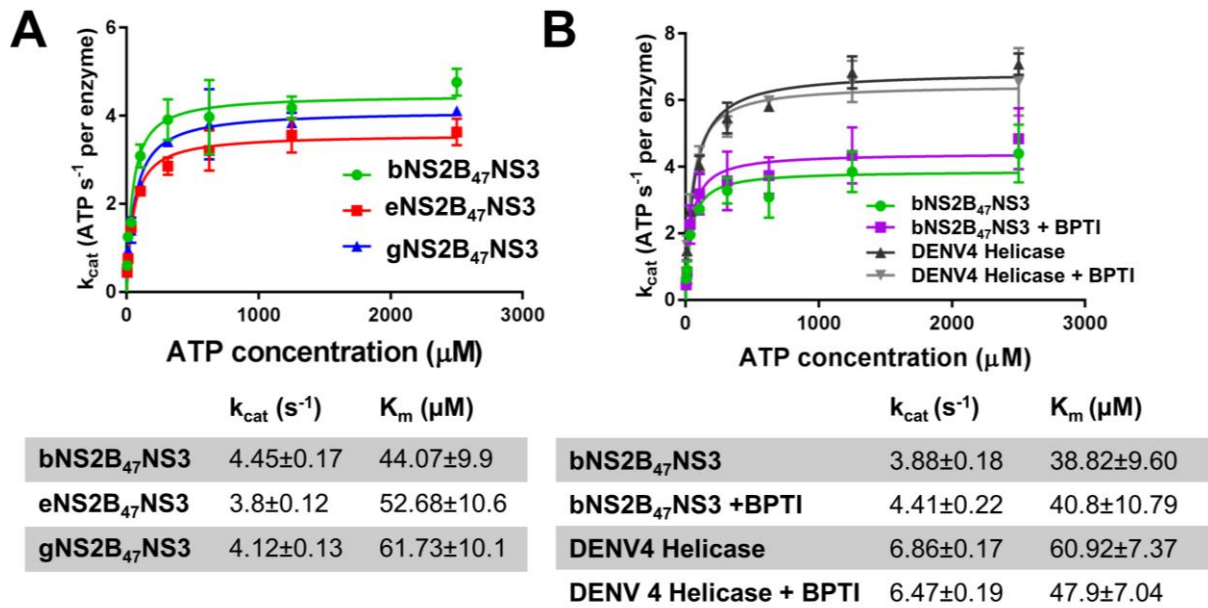

604

605 **Fig 5. The ATP hydrolysis activity of NS2B<sub>47</sub>NS3 constructs were compared along with**

606 **Helicase.** (A) Rate of ATP hydrolysis of bNS2B<sub>47</sub>NS3, eNS2B<sub>47</sub>NS3 and gNS2B<sub>47</sub>NS3. The

607 Michaelis-menten parameters are stated below the curves. The presence of artificial glycine

608 linker and of NS2BNS3 cleavage junction slightly lowers the ATP hydrolysis by increasing

609  $K_m$ . (B) ATP hydrolysis of bNS2B<sub>47</sub>NS3 with or without BPTI shows that presence of

610 inhibitor does not interfere with ATP hydrolysis. The DENV4 helicase was used as positive

611 control.

612

613 **Supporting information**

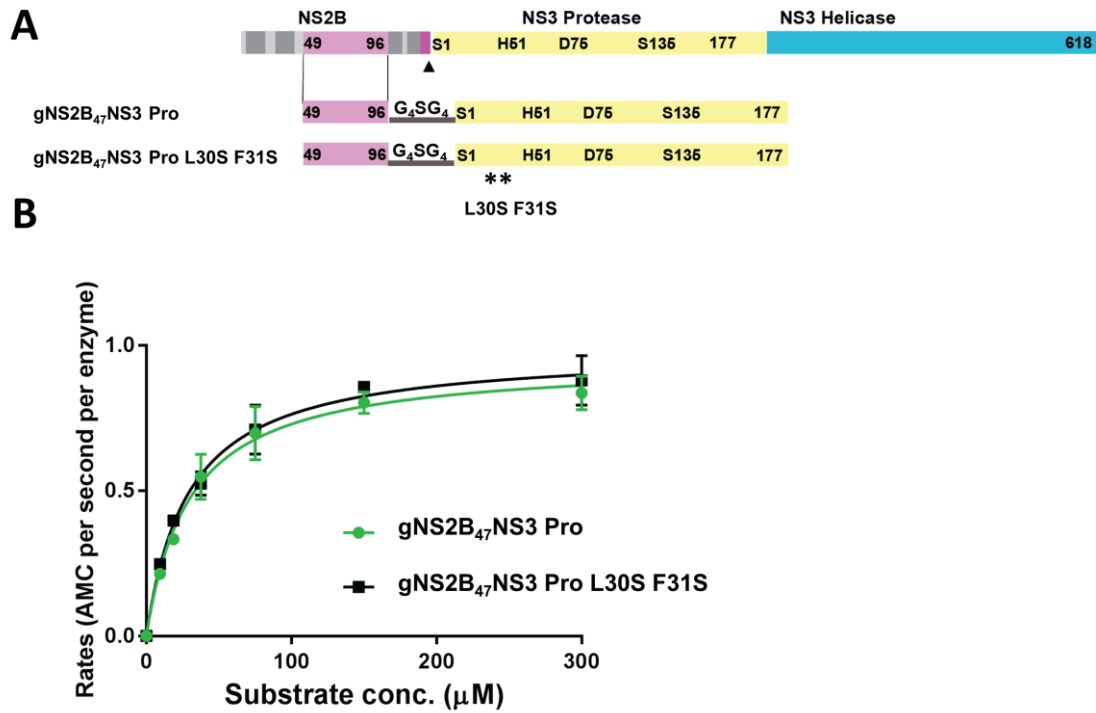

614

615 **S1 Fig. The mutations L30S F31S do not interfere with protease activity.** (A) Graphical  
616 representation of NS2B NS3 gene, construct design and mutations. NS2B in magenta, and  
617 NS3 protease in yellow and NS3 helicase in cyan. Protease and helicase are labelled and  
618 boundary residues are numbered. The catalytic residues, as well as mutated residues are  
619 labelled and numbered. (B) Enzymatic activity of gNS2B<sub>47</sub>NS3 Pro and gNS2B<sub>47</sub>NS3 Pro  
620 L30S F31S. Both enzymes have similar  $k_{cat}$  and  $K_m$  indicating that L30S F31S mutations do  
621 not interfere with enzymatic activity.

622

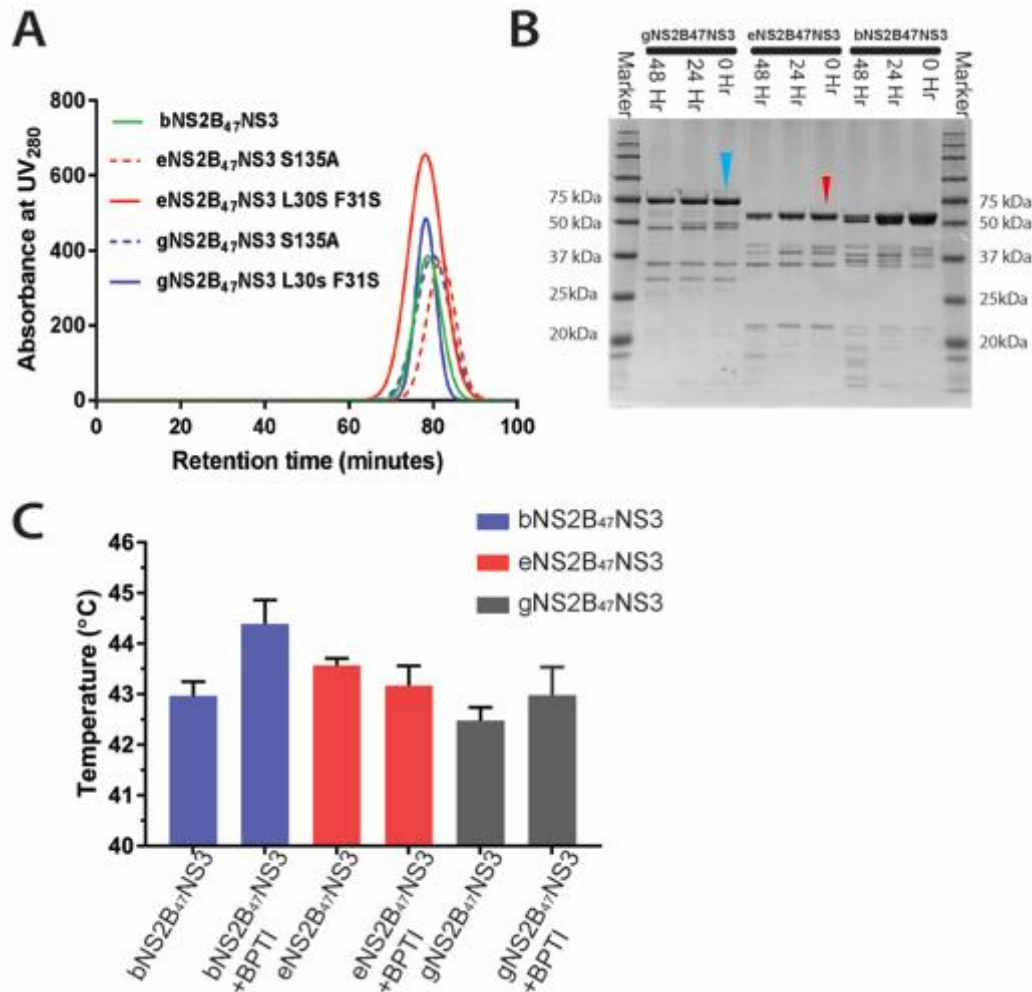

623

624 **S2 Fig. Purification of gNS2B<sub>47</sub>NS3, eNS2B<sub>47</sub>NS3 and bNS2B<sub>47</sub>NS3 showed monomeric**

625 **proteins.** (A) SEC chromatography profile of full length proteins showing that full length

626 NS3 is monomeric. (B) SDS-PAGE analysis of full length NS3 auto proteolysis over 0hour,

627 24hour and 48 hours The gNS2B<sub>47</sub>NS3 and eNS2B<sub>47</sub>NS3 are indicated with blue and red

628 arrows respectively.. (C) Melting temperatures of bNS2B<sub>47</sub>NS3, eNS2B<sub>47</sub>NS3 and

629 gNS2B<sub>47</sub>NS3 with/without BPTI. The gNS2B<sub>47</sub>NS3 has the lowest T<sub>m</sub> indicating that

630 gNS2B<sub>47</sub>NS3 has lower stability compared to eNS2B<sub>47</sub>NS3 and bNS2B<sub>47</sub>NS3.

631



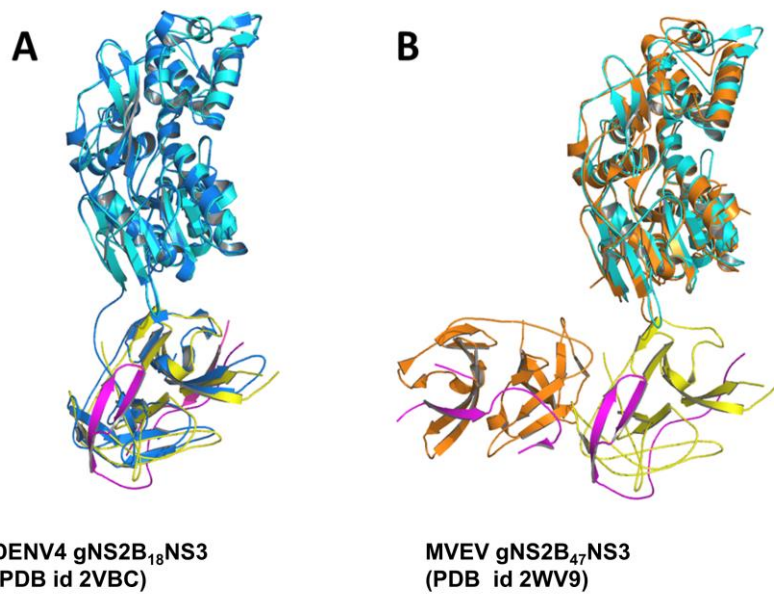

632

633 **S3 Fig. Comparison between overall conformations of NS2B<sub>47</sub>NS3 with previous**

634 **structures.** In both (A) and (B), gNS2B<sub>47</sub>NS3 free enzyme structure in closed conformation

635 was shown in cyan for helicase domain, yellow for protease and magenta for NS2B (A)

636 Superposition of current full length NS2B<sub>47</sub>NS3 with DENV4 full length NS3 structure with

637 18 residues from NS2B cofactor which is shown in blue for NS3 and magenta for NS2B (Luo

638 et al PDB id 2VBC) (B) Superposition of current full length NS2B<sub>47</sub>NS3 structure with

639 MVEV gNS2B<sub>47</sub>NS3 structure. The MVEV NS3 is shown in orange and NS2B in magenta.

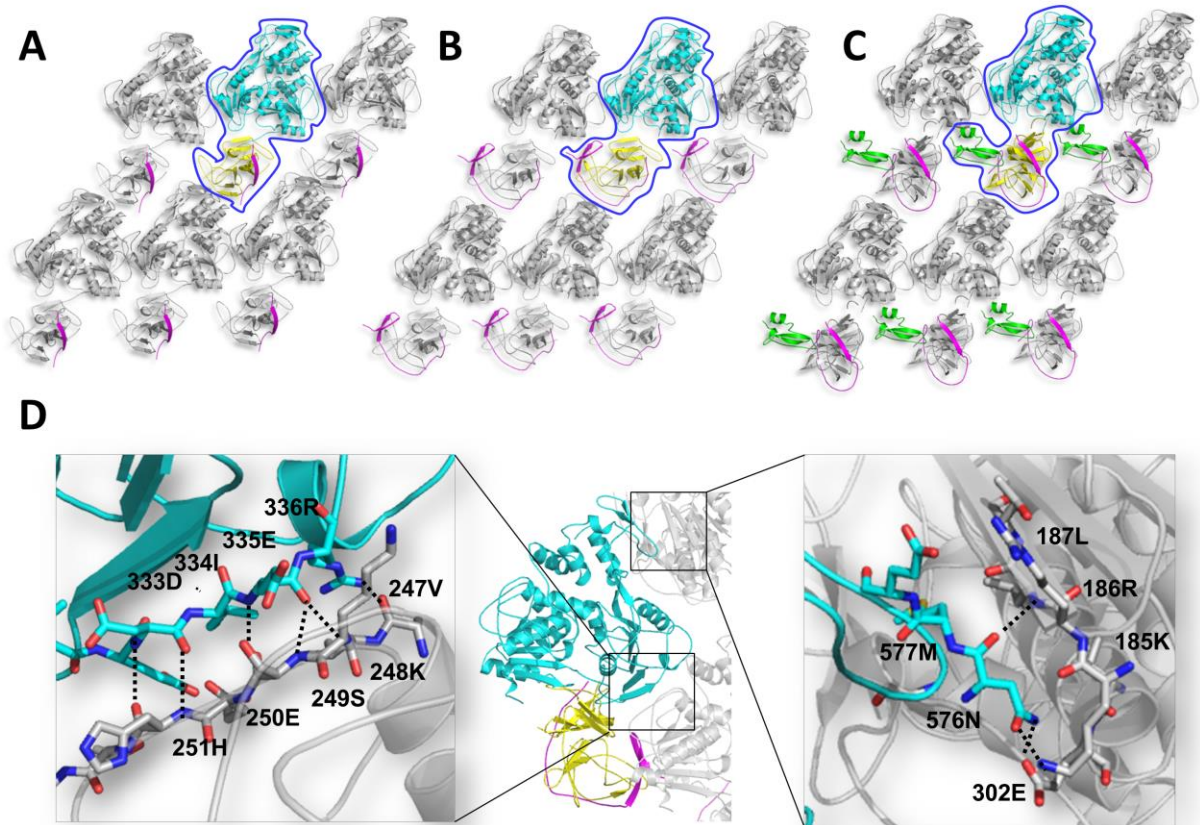

640

641 **S4 Fig. Major crystal contacts in full length NS3 structures are formed by the helicase**

642 **domain.** Here we display the three conformations of gNS2B<sub>47</sub>NS3 full length structures (A)

643 open NS2B conformation, (B) closed NS2B conformation, (C) enzyme in complex with BPTI

644 along with its symmetry mates. NS3 helicase domain is shown in cyan and NS3 protease in

645 yellow. The surrounding symmetry mates are shown in grey. The NS2B is shown magenta.

646 (D) Detailed interactions of major crystal contacts. The residues that are interacting with the

647 symmetry mates are presented with residue number. The protease domain does not interact

648 with neighbouring molecules giving it the conformational freedom to adopt different

649 orientations.

650

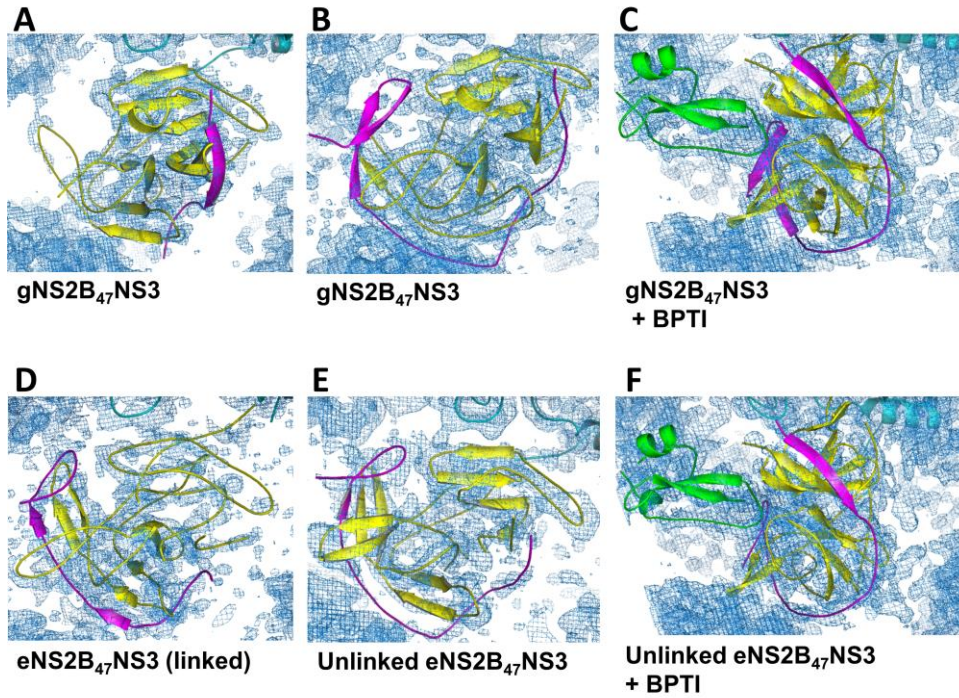

651

652 **S5 Fig.** The  $2mF_o - F_c$  maps of NS2B<sub>47</sub>NS3 structures display solvent shell around the

653 **electron density of protein.** This indicates that the structure solutions for the protease

654 domain are correct and refined. The NS2B is colored in magenta, NS3 protease in yellow and

655 BPTI in green.

656

657

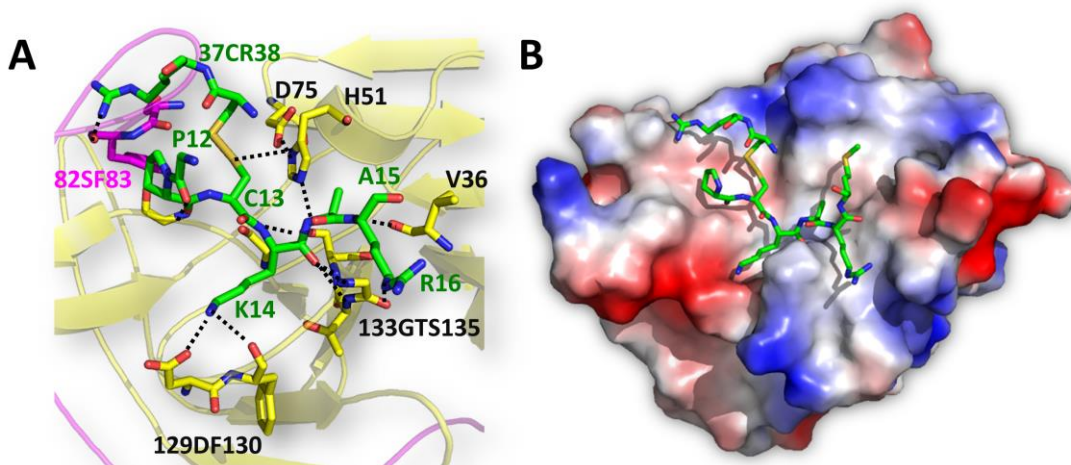

658

659 **S6 Fig. Binding of BPTI to NS3 protease is conserved among the different flavivirus**  
660 **protease structures.** (A) Detailed interactions between BPTI and NS2B-NS3 protease. BPTI  
661 is presented in green, NS2B in magenta and NS3 in yellow. The interacting residues are  
662 shown as sticks. The residues numbers are labelled and color accordingly. (B) Electrostatic  
663 surface view of eNS2B<sub>47</sub>NS3 protease domain with bound BPTI residues in the pocket.

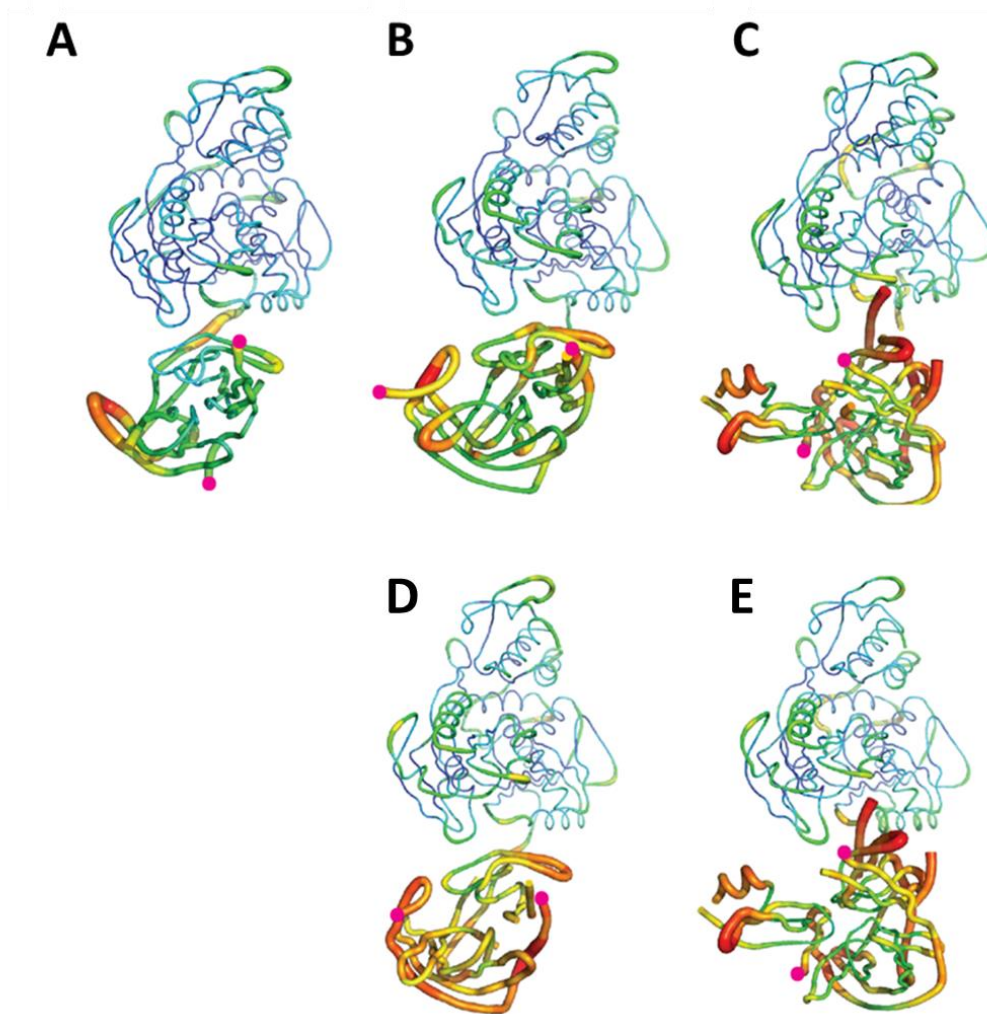

664

665 **S7 Fig. The b-factor putty representation of the full length crystal structures of**  
666 **NS2B<sub>47</sub>NS3 shows that protease domain is dynamic and changes conformations.**  
667 (A)(B)(C) Full length crystal structures of gNS2B<sub>47</sub>NS3 (A) in open NS2B conformation (B)  
668 in closed NS2B conformation (C) in complex with BPTI. (D)(E) Full length crystal structure

669 of unlinked eNS2B<sub>47</sub>NS3 (D) in closed NS2B conformation and (E) in complex with BPTI.

670 Magenta dots represent the N- and C-terminus residues of NS2B.

671

| Construct name                                    | Crystallisation conditions        | Unit cell dimensions<br>(a b c,<br>α β γ)           | Conformation                    |
|---------------------------------------------------|-----------------------------------|-----------------------------------------------------|---------------------------------|
| <b>gNS2B<sub>47</sub>NS3 S135A</b>                | 0.1 M MES pH 6.4, 15% PEG<br>6000 | 52.78 <b>75.9 86.81</b><br>89.92 90.32 <b>93.07</b> | Open                            |
| <b>gNS2B<sub>47</sub>NS3 L30S F31S</b>            | 0.1 M MES pH 6.4, 15% PEG         | 52.92 <b>88.72 81.30</b><br>90 <b>93.08</b> 90      | Closed                          |
| <b>eNS2B<sub>47</sub>NS3 S135A</b>                | 0.1M MES pH 6.4, 10% PEG<br>4000  | 52.77 88.3 81.11<br>90 <b>92.34</b> 90              | Closed                          |
| <b>eNS2B<sub>47</sub>NS3 L30S F31S</b>            | 0.1 M MES pH 6.4, 10% PEG<br>6000 | 52.9 88.77 81.45<br>90 <b>93.85</b> 90              | Closed                          |
| <b>gNS2B<sub>47</sub>NS3 S135A + BPTI</b>         | 0.1 MES pH 6.4, 12% PEG<br>6000   | 53.06 <b>85.63 85.51</b><br>90 <b>97.95</b> 90      | Closed, in complex with<br>BPTI |
| <b>eNS2B<sub>47</sub>NS3 L30S F31S +<br/>BPTI</b> | 0.1 M MES pH 6.0, 12% PEG<br>4000 | 53.02 <b>87.493 86.46</b><br>90 <b>98.25</b> 90     | Closed, in complex with<br>BPTI |
| <b>bNS2B<sub>47</sub>NS3</b>                      | 0.1 M MES pH 6.0, 12% PEG<br>6000 | 52.65 <b>87.64 80.12</b><br>90 <b>91.94</b> 90      |                                 |

672

673 **S1 Table. Crystallisation conditions and unit cell dimensions of NS2B<sub>47</sub>NS3 constructs.**

674 All the crystal structures of NS2B<sub>47</sub>NS3 crystallised in three distinct unit cell dimensions (1)

675 open conformation, (2) closed conformation and (3) closed in complex with BPTI. The

676 glycine linker construct gNS2B<sub>47</sub>NS3 free enzyme structures are in both open and closed

677 conformation without an inhibitor, where eNS2B<sub>47</sub>NS3 free enzyme structures are only

678 captured in closed conformation regardless of the presence of inhibitor
